# Supplementary material for: Reuse of Sewage Sludge as Organic Agricultural Products: An Efficient Technology-Based Initiative
Source: Hindawi journal article supplement (doi:10.1155/2024/1433973), 2024-02-07
Supplement: f1 [file 1433973.f1.docx]

**Supplementary material**

Table 1: Data showing solid particles (%) in the different centrifuge outlets in the SBR in January, 2022

| **Date** | **Centrifuge (Outlet) Sample-1** | **Centrifuge (Outlet) Sample-2** | **Centrifuge (Outlet) Sample-3** | **Centrifuge (Outlet) Sample-4** | **Centrifuge (Outlet) Sample-5** | **Centrifuge (Outlet) Sample-6** | **Centrifuge (Outlet) Sample-7** |
| --- | --- | --- | --- | --- | --- | --- | --- |
| **01-01-22** | 24.93 | 26.48 | 29.03 | 25.64 | 27.17 | 25.36 | 23.97 |
| **02-01-22** | 26.17 | 23.61 | 25.85 | 26.18 | 24.19 | 22.84 | 24.04 |
| **03-01-22** | 23.78 | 26.08 | 24.92 | 22.85 | 21.94 | 23.18 | 21.60 |
| **04-01-22** | 25.64 | 21.91 | 23.40 | 27.43 | 28.68 | 24.21 | 25.11 |
| **05-01-22** | 24.07 | 22.62 | 25.79 | 24.13 | 23.93 | 25.09 | 22.69 |
| **06-01-22** | 26.35 | 29.17 | 24.95 | 27.76 | 30.11 | 28.15 | 25.98 |
| **07-01-22** | 22.75 | 26.09 | 23.84 | 21.97 | 24.49 | 22.93 | 23.64 |
| **08-01-22** | 26.58 | 23.75 | 25.38 | 27.96 | 25.70 | 23.82 | 24.65 |
| **09-01-22** | 22.93 | 25.46 | 26.42 | 24.95 | 22.43 | 24.60 | 20.72 |
| **10-01-22** | 23.71 | 21.35 | 24.09 | 22.58 | 20.11 | 22.95 | 21.15 |
| **11-01-22** | 24.19 | 22.68 | 25.31 | 23.95 | 26.56 | 25.56 | 23.60 |
| **12-01-22** | 26.80 | 23.94 | 25.62 | 27.08 | 24.38 | 28.10 | 23.96 |
| **13-01-22** | 24.91 | 26.18 | 23.35 | 25.39 | 22.84 | 20.69 | 21.53 |
| **14-01-22** | 23.75 | 24.59 | 27.52 | 29.03 | 26.53 | 28.19 | 24.95 |
| **15-01-22** | 25.06 | 22.82 | 24.65 | 26.16 | 23.40 | 25.56 | 22.78 |
| **16-01-22** | 22.83 | 26.06 | 28.37 | 23.97 | 29.11 | 26.72 | 25.65 |
| **17-01-22** | 26.38 | 29.54 | 25.06 | 27.64 | 25.98 | 24.65 | 22.94 |
| **18-01-22** | 28.59 | 24.78 | 27.18 | 25.41 | 23.80 | 22.94 | 20.98 |
| **19-01-22** | 23.62 | 26.41 | 24.76 | 27.87 | 29.63 | 25.07 | 26.32 |
| **20-01-22** | 25.40 | 22.94 | 26.14 | 21.95 | 24.08 | 22.71 | 24.98 |
| **21-01-22** | 24.94 | 27.39 | 24.82 | 26.62 | 28.64 | 26.52 | 24.40 |
| **22-01-22** | 27.89 | 25.14 | 28.62 | 26.95 | 25.40 | 29.38 | 26.03 |
| **23-01-22** | 24.93 | 22.68 | 26.45 | 24.64 | 21.94 | 25.11 | 21.72 |
| **24-01-22** | 22.75 | 26.04 | 23.34 | 26.39 | 27.65 | 26.48 | 25.11 |
| **25-01-22** | 24.56 | 22.70 | 20.98 | 23.65 | 22.47 | 24.09 | 21.48 |
| **26-01-22** | 23.79 | 26.18 | 24.80 | 23.96 | 27.10 | 26.39 | 24.31 |
| **27-01-22** | 25.39 | 22.14 | 21.98 | 24.65 | 22.55 | 20.93 | 21.69 |
| **28-01-22** | 25.68 | 29.58 | 24.97 | 30.71 | 26.05 | 28.52 | 24.95 |
| **29-01-22** | 28.49 | 27.87 | 25.11 | 39.57 | 32.63 | 26.45 | 27.11 |
| **30-01-22** | 24.97 | 26.54 | 28.03 | 25.46 | 23.98 | 25.76 | 23.76 |
| **31-01-22** | 26.19 | 29.05 | 26.84 | 28.35 | 30.21 | 28.49 | 25.67 |

Table 2: MLSS values in the six basins of the STP for the month of January 2022

| **Date** | **Basin-1 M.L.S.S** | **Basin-2 M.L.S.S** | **Basin-3 M,L.S.S** | **Basin-4 M.L.S.S** | **Basin-5 M.L.S.S** | **Basin-6 M.L.S.S** |
| --- | --- | --- | --- | --- | --- | --- |
| 01-01-22 | 2978 | 3254 | 3106 | 3382 | 3018 | 2794 |
| 02-01-22 | 3352 | 3768 | 3588 | 2854 | 2482 | 3418 |
| 03-01-22 | 3126 | 3524 | 3268 | 2508 | 2668 | 3960 |
| 04-01-22 | 2764 | 3278 | 2694 | 2946 | 3014 | 4384 |
| 05-01-22 | 3280 | 2740 | 2908 | 2682 | 2798 | 3658 |
| 06-01-22 | 2914 | 2984 | 3320 | 3106 | 2496 | 3180 |
| 07-01-22 | 2674 | 3298 | 2768 | 2864 | 2858 | 3566 |
| 08-01-22 | 2484 | 2668 | 3092 | 2580 | 3244 | 3318 |
| 09-01-22 | 2702 | 3086 | 2534 | 2942 | 2786 | 3062 |
| 10-01-22 | 3224 | 2810 | 2896 | 2460 | 2982 | 3572 |
| 11-01-22 | 3648 | 2564 | 3318 | 2782 | 3414 | 3196 |
| 12-01-22 | 3120 | 2942 | 2656 | 3124 | 2976 | 2808 |
| 13-01-22 | 3278 | 2792 | 2904 | 3410 | 2564 | 3340 |
| 14-01-22 | 2796 | 3254 | 2460 | 2884 | 3016 | 3672 |
| 15-01-22 | 2940 | 3668 | 2738 | 3126 | 3558 | 4024 |
| 16-01-22 | 2558 | 3340 | 3212 | 3884 | 3982 | 3468 |
| 17-01-22 | 2874 | 3794 | 2554 | 3612 | 4268 | 3802 |
| 18-01-22 | 2692 | 3178 | 2806 | 3048 | 3580 | 3546 |
| 19-01-22 | 2858 | 2712 | 3194 | 3302 | 3864 | 4082 |
| 20-01-22 | 2804 | 3490 | 3764 | 3154 | 4192 | 3268 |
| 21-01-22 | 3264 | 3802 | 3248 | 3472 | 3780 | 2704 |
| 22-01-22 | 3042 | 3068 | 2780 | 2738 | 3214 | 2596 |
| 23-01-22 | 2780 | 3452 | 2514 | 3262 | 3964 | 2918 |
| 24-01-22 | 2564 | 2884 | 2890 | 3604 | 3452 | 3376 |
| 25-01-22 | 2946 | 2510 | 2618 | 2958 | 4028 | 3792 |
| 26-01-22 | 2694 | 3054 | 2364 | 2602 | 3782 | 3260 |
| 27-01-22 | 2514 | 2642 | 2906 | 3128 | 3422 | 3614 |
| 28-01-22 | 2850 | 2488 | 3198 | 2780 | 3058 | 3378 |
| 29-01-22 | 3092 | 2908 | 2684 | 3268 | 2502 | 3854 |
| 30-01-22 | 2548 | 2572 | 2368 | 3694 | 2974 | 3276 |
| 31-01-22 | 2794 | 2694 | 2706 | 4072 | 3244 | 3562 |
